# Supplementary material for: Potential of Essential Oils from Anise, Dill and Fennel Seeds for the Gypsy Moth Control
Source: MDPI journal article supplement (doi:10.3390/plants10102194), 2021-10-15
Supplement: s1 [file s1]

**Table S1.** Summary of  $p$  values from Dunnett test indicating significance (values in bold) of differences in amounts of consumed, assimilated and metabolized food between treatment groups and control group.

|             | Consumed | Amount of food<br>Assimilated | Metabolized |
|-------------|----------|-------------------------------|-------------|
| Anise 0.1%  | <0.001   | <0.001                        | 0.134       |
| 0.25%       | <0.001   | <0.001                        | <0.001      |
| 0.5%        | <0.001   | <0.001                        | 0.010       |
| Dill 0.1%   | <0.001   | <0.001                        | <0.001      |
| 0.25%       | <0.001   | <0.001                        | <0.001      |
| 0.5%        | <0.001   | <0.001                        | 0.003       |
| Fennel 0.1% | 0.006    | 0.004                         | 0.650       |
| 0.25%       | <0.001   | <0.001                        | <0.001      |
| 0.5%        | <0.001   | <0.001                        | <0.001      |
| Neem 0.1%   | <0.001   | <0.001                        | 0.002       |
| 0.25%       | <0.001   | <0.001                        | <0.001      |
| 0.5%        | <0.001   | <0.001                        | <0.001      |
