# Supplementary material for: Potential of Essential Oils from Anise, Dill and Fennel Seeds for the Gypsy Moth Control
Source: MDPI journal article supplement (doi:10.3390/plants10102194), 2021-10-15
Supplement: s1 [file s1]

**Table S2.** Summary of *p* values from the Welch 1-way ANOVA indicating significance (values in bold) of differences in growth and nutritional indices between treatment groups and control group. MG- mass gain; RGR- relative growth rate; RCR- relative consumption rate; RMR- relative metabolic rate; ECI- efficiency of conversion of ingested food; AD- approximate digestibility; ECD- efficiency of conversion of digested food; MC- metabolic cost.

|             | MG     | RGR    | RCR    | RMR   | ECI    | AD     | ECD/M<br>C |
|-------------|--------|--------|--------|-------|--------|--------|------------|
| Anise 0.1%  | <0.001 | 0.005  | <0.001 | 0.112 | 0.011  | 0.065  | 0.074      |
| 0.25%       | <0.001 | 0.003  | <0.001 | 0.004 | 0.008  | <0.001 | 0.086      |
| 0.5%        | <0.001 | <0.001 | <0.001 | 0.004 | <0.001 | <0.001 | <0.001     |
| Dill 0.1%   | 0.019  | 0.057  | <0.001 | 0.003 | 1.000  | <0.001 | 1.000      |
| 0.25%       | <0.001 | 0.011  | <0.001 | 0.002 | 0.463  | <0.001 | 1.000      |
| 0.5%        | <0.001 | <0.001 | <0.001 | 0.014 | <0.001 | <0.001 | <0.001     |
| Fennel 0.1% | 0.001  | 0.007  | 0.001  | 0.196 | 0.039  | 0.292  | 0.199      |
| 0.25%       | <0.001 | 0.006  | <0.001 | 0.002 | 0.156  | 0.042  | 0.906      |
| 0.5%        | <0.001 | <0.001 | <0.001 | 0.009 | <0.001 | <0.001 | <0.001     |
| Neem 0.1%   | <0.001 | 0.003  | <0.001 | 0.004 | 0.047  | 0.002  | 0.570      |
| 0.25%       | <0.001 | 0.003  | <0.001 | 0.004 | 0.001  | 0.050  | 0.011      |
| 0.5%        | <0.001 | 0.003  | <0.001 | 0.001 | 0.004  | 0.009  | 0.159      |
